# Supplementary material
Source: Springer Nature journal article supplement (https://www.springermedizin.de/resource/supplementary/12947_2012_442_MOESM2_ESM.pdf/9555780)

**(A)**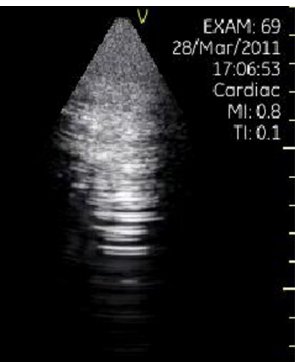**(B)**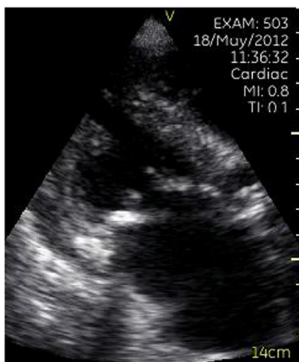**(C)**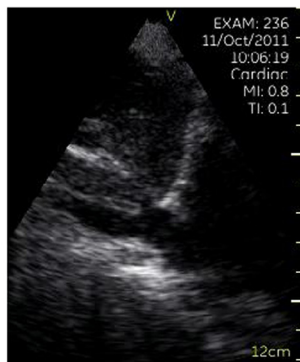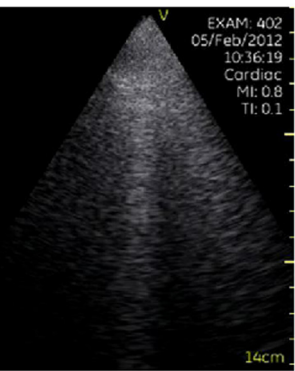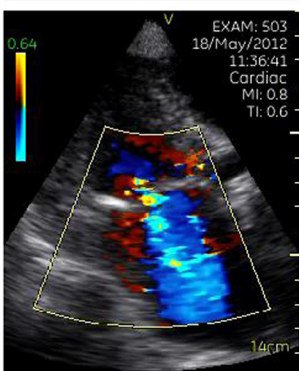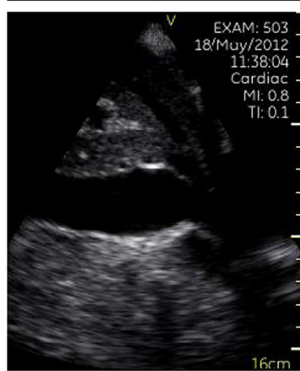

Supplement: MOESM2 [file 9555780]
